# Supplementary material
Source: publisher figshare collection journal article supplement (https://frontiersin.figshare.com/ndownloader/files/22448864)
Supplement: Supplementary file 1 [file 22448864]

**Supplementary Information**

**SI Table 1.** List of considered polycyclic aromatic hydrocarbons with number of aromatic rings, weight class, and mass to charge ratio used for analysis.

| **Compound** | No of aromatic rings | Weight class | m/z |
| --- | --- | --- | --- |
| Napthalene | 2 | LMW | 128 |
| Acenaphthylene | 2 | LMW | 152 |
| Acenapthene | 2 | LMW | 154 |
| Flourene | 2 | LMW | 166 |
| Phenanthrene | 3 | MMW | 178 |
| Anthracene | 3 | MMW | 178 |
| Flouranthene | 3 | MMW | 202 |
| Pyrene | 4 | MMW | 202 |
| Benzo(*a*)anthracene | 4 | MMW | 202 |
| Chrysene | 4 | MMW | 228 |
| Retene | 3 | MMW | 234 |
| Benzo(*b*)fluoranthene | 4 | HMW | 252 |
| Benzo(*k*)fluoranthene | 4 | HMW | 252 |
| Benzo(*e*)pyrene | 5 | HMW | 252 |
| Benzo(*a*)pyrene | 5 | HMW | 252 |
| Perylene | 5 | HMW | 252 |
| Benzo(*ghi*)perylene | 6 | HMW | 276 |
| Indeno(1,2,3-*cd)*pyrene | 5 | HMW | 276 |
| Dibenzo(*ah)*antracene | 5 | HMW | 278 |

**SI Table 2.** List of considered sterols with chemical classification and mass to charge quantification (qualification) ratio used for analysis.

| **Compound** | Classification | m/z |
| --- | --- | --- |
| Coprostanol | 5β-stanol | 215 (370) |
| Epi-coprostanol | epi-5β-stanol | 215 (370) |
| Cholesterol | Δ5-sterol | 368 (370) |
| Cholestanol | 5α-stanol | 355 (460) |
| Sitosterol | Δ5-sterol | 396 (215) |
| Sitostanol | 5α-stanol | 473 (215) |
